# Supplementary material for: Exploring the unusual occurrence, chemistry, and structural topology of åsgruvanite-(Ce), Ce 16 Ca 5 Al(SiO 4 ) 6 (AsO 3 ) 8 (CO 3 ) 2 Cl 3 (ClF 3 )(OH) 2 , a new rare earth element (REE) mineral from Västmanland, Sweden
Source: Copernicus journal article supplement (doi:10.5194/ejm-37-937-2025), 2025-12-16
Supplement: Supplementary file [file ejm-37-937-2025-supplement-title-page.pdf › ejm-37-937-2025-supplement-title-page.pdf]

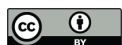

*Supplement of*

**Exploring the unusual occurrence, chemistry, and structural topology of åsgruvanite-(Ce),  $\text{Ce}_{16}\text{Ca}_5\text{Al}(\text{SiO}_4)_6(\text{AsO}_3)_8(\text{CO}_3)_2\text{Cl}_3(\text{ClF}_3)(\text{OH})_2$ , a new rare earth element (REE) mineral from Västmanland, Sweden**

Alice Taddei et al.

*Correspondence to:* Dan Holtstam ([dan.holtstam@nrm.se](mailto:dan.holtstam@nrm.se))

- [ejm-37-937-2025-supplement-title-page.pdf](#)
- [asgr\\_fin\\_notwin.cif](#)

The copyright of individual parts of the supplement might differ from the article licence.
